# Supplementary material for: Associations Between Elemental Constituents of Fine Particulate Matter and Subclinical Atherosclerosis in Adolescents and Young Adults
Source: Research Square preprint supplement (doi:10.21203/rs.3.rs-560265/v1), 2021-06-02
Supplement: Supplementary file 1 [file 9ec012502363ca4974171dff.docx]

**Supplemental Table 1** Individual childhood characteristics between excluded and included subjects

| Variables | Excluded subjects  (n=6,371) | Included Subjects  (N=789) | p-value |
| --- | --- | --- | --- |
| Male; no. (%) | 2913 (47.63) | 313 (39.7) | <0.0001 |
| Age, years | 12.5±2.7 | 12.8±2.6 | 0.0006 |
| BMI, kg/m2 | 12.5±2.7 | 12.8±2.6 | 0.0006 |
| Total cholesterol, mg/dL | 19.2±3.8 | 19.3±3.9 | 0.6020 |
| Fasting glucose, mg/dl | 159.5±32.4 | 163.5±37.2 | 0.0044 |
| DBP, mmHg | 84.8±16.0 | 85.8±20.5 | 0.1683 |
| SBP, mmHg | 108.7±14.1 | 111.3±17.5 | <0.0001 |

Data are n (%) or mean±SD. Continuous variables were compared with unpaired t-tests; categorical variables were compared with χ² tests.

Abbreviations: BMI: body mass index; SBP: systolic blood pressure; DBP: diastolic blood pressure.
